# Supplementary material for: A Novel Acquired t(2;4)(q36.1;q24) with a Concurrent Submicroscopic del(4)(q23q24) in An Adult with Polycythemia Vera
Source: MDPI journal article supplement (doi:10.3390/cancers10070214), 2018-06-25
Supplement: s1 [file s1]

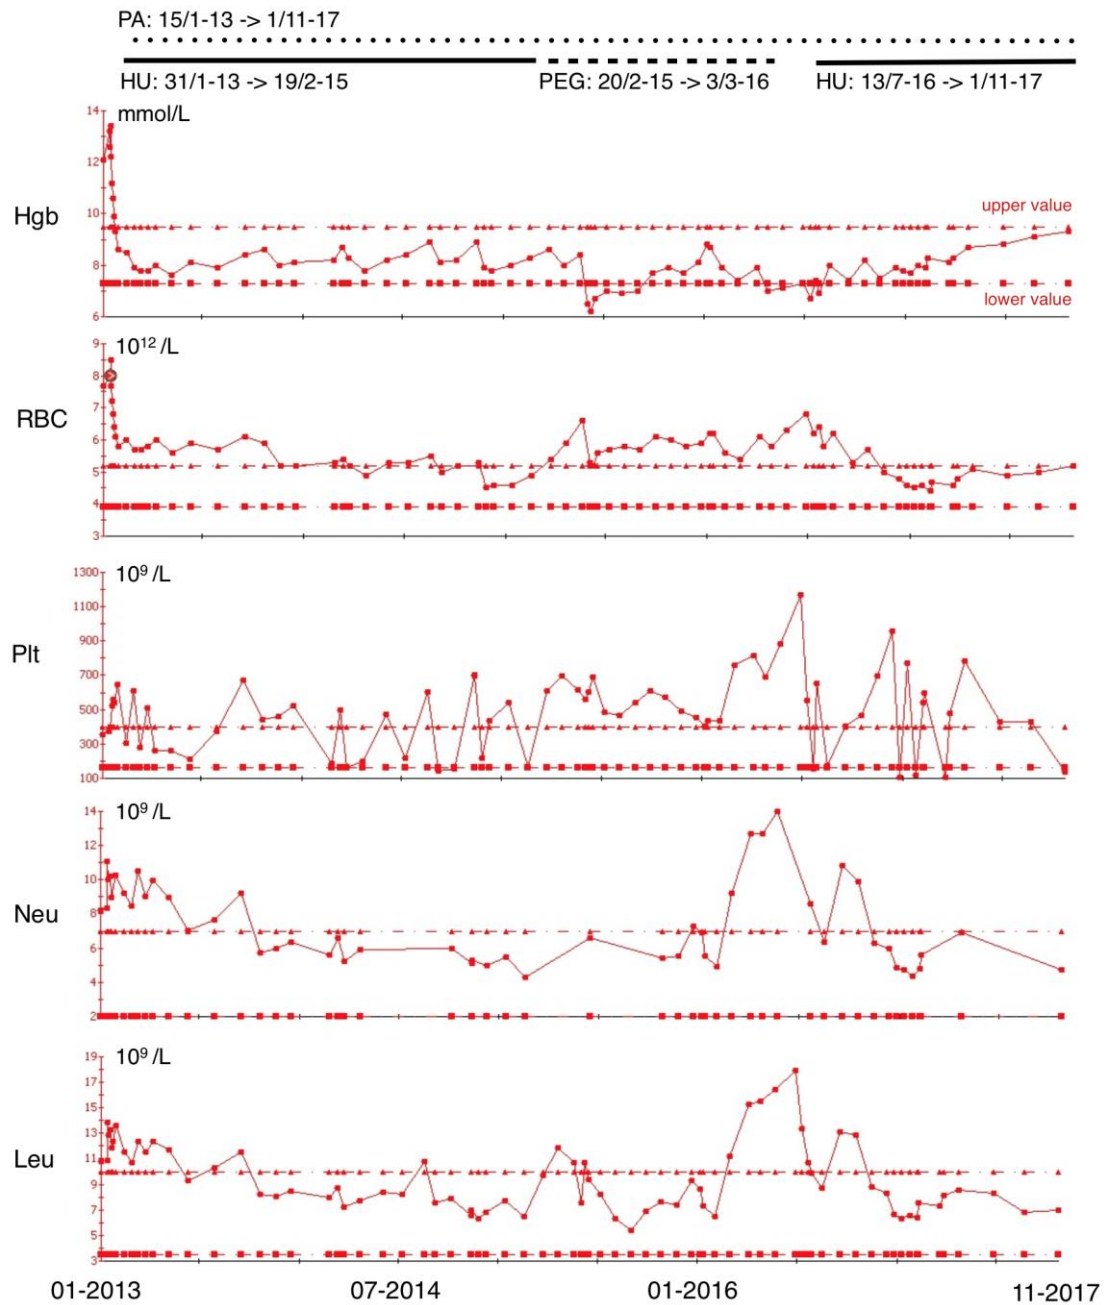

**Supplemental Figure 1.** Longitudinal evolution of biochemical parameters. Measured biochemical values of peripheral blood from the patient in the period from January 2013 (01-2013) at diagnosis of PV to follow-up in November 2017 (11-2017) are depicted. Hemoglobin (Hgb); red blood cell count (RBC); platelet count (Plt); neutrophils count (Neu); and leucocyte count (Leu). Red horizontal lines in each panel indicate upper and lower reference values for each analysis. PA: phlebotomy and anti-thrombotic treatment; HU: hydroxy urea treatment; and PEG: pegylated interferon alfa-2a treatment.
